# Supplementary material for: Perceptions of voluntary workers in cancer organisations on the knowledge of secondary breast cancer symptoms , healthcare communication and diagnostic referral pathways among the patients they support in Northern Ireland
Source: Research Square preprint supplement (doi:10.21203/rs.3.rs-5663858/v1), 2024-12-23
Supplement: Supplementary file 1 [file e673c071f5c39d99447ac9eb.docx]

S1- Review table

| Sub-Themes | Themes |
| --- | --- |
| Patient lack of knowledge and awareness of secondary breast cancer  HCPs lack of knowledge and awareness of secondary breast cancer  Awareness from media | Lack of knowledge and awareness of secondary breast cancer |
| Poor communication process  Lack of clarity and compassion in patient-provider communication  Quality of information | Communication gap in breast cancer care provision |
| Impact of diagnosis on patient  Impact of diagnosis on support worker | Impact of diagnosis |
| Unmet needs of patients  Access to services  Support for SBC patients | Gaps in cancer care for women with secondary breast cancer care. |

S2- Audit trails from data extracts to theme formation table

| Data extracts | Codes | Sub-themes | Themes |
| --- | --- | --- | --- |
| 1)When some, well, they do  Now. Well, let me  give you a quotation from  the girls. They, they, we are  all educated after our  diagnosis. When it is simply  too late.  I'm going to tell you the things that the girls that I photograph have been referred for, prior to. They've been given painkillers, they've been given antibiotics, they've been sent for physiotherapy somebody actually taking them seriously. First they're too hormonal, they're too young, they're breastfeeding and another one was sent for an inhaler. And every single one of those delaying their secondary diagnosis | Getting educated about secondary breast cancer after primary breast cancer disease.  Misdiagnosis of patients’ symptoms by consultants. | Women’s lack of awareness and knowledge of secondary breast cancer.  HCPs Awareness and knowledge of signs and symptoms of breast cancer awareness. | Lack of awareness and knowledge of secondary breast cancer |
| 2)OK So in terms of actually receiving the diagnosis, unfortunately in Northern Ireland very often the way they receive their diagnosis is in the worst possible environment, and that would be a number of them have received it in the A&E with a doctor that they've never met before.  Is that being listened to that some of the women felt that they're not listened to with their primary diagnosis where some of them just said I want a double mastectomy and they were refused, one woman was just refused twice. No, you don't need that. We don't need to do that now. Now she's living with secondary breast cancer. So there's that anger around it felt they were not being listened to.  The it had spread, but she didn't even look at her  in the face. Didn't look at her in the eye  the reports that we know and I could say to you 99.5% of people diagnosed with cancer always say, I don't remember what they said after they said you've got cancer. So you need to be told quite a few times, not just once. You need to have everythingreally clearly documented and the communication between those people involved in your care and your treatment needs to be 100%, not 99.5%, not anything other than 100%.  People think about the pink, fluffy, curable one, and even some of the girls have had people saying to them that's a good one, one to get if you're going to get cancer and you know that's the misperception because I think that's the pink fluffy commercial side of breast cancer and fundraising, and pink ribbons and balloons have overtaken thereality of it.  During that course or and whenever they are discharged after their five years, being clear and they're told time, you can ring the bell, your treatments all finished at the time of breast primary breast cancer. They are not given a leaflet that they tell them what to look out for. They are very often given the impression that they are cured, which is not true | Receiving the cancer diagnosis news in a perceived poor and unfamiliar environment  No person centered communication  Oncologist not eye contact during consultation  Patient not understanding information relayed by their doctor.  Misperception about breast cancer from social media and breast cancer campaigns.  Patients not informed about possible reoccurrence after primary cancer treatment | Poor communication process  Poor communication process  Lack of compassion and clarity in patient provider relationship.  Quality of information | Communication in breast cancer care |
| 3)The younger girls are obviously angrier. Because it has impacted their lives at such a young age, it's impacted their possibility of having children or. I suppose they're more introspective.  You know, stigma that's associated and those feelings that's associated with the word cancer, you know, it's trying to move away from that.  know on their behalf so many times and I'm very aware that statistics tell me that I will outlive every single woman that I have photographed.  I aim to show the physical and emotional pain of living with this disease.  I do this in the knowledge that these women need help from from people like me. And so I carry that on my shoulders.  .  4) have found, very frustratingly, that here in the north of Ireland we have one Secondary breast care nurse.  In Northern Ireland they don't have access to trials. Practically speaking, there are none that are run here. There's no drug trials and for them to take advantage of them they have to go across the water can and they're not able to do that, you know, until they're right, you know, until they have finished all their protocols  Surveys at the time gave feedbacks was very clear I want more one on ones with my health professional. I want more conversation about what my treatment does , I want to be advised and I want to be given a choice of treatment | Younger patients physically and emotionally impacted  Stigma associated with secondary breast cancer diagnosis  Emotional challenges of support worker role  Support worker advocating for patients  Limited secondary breast specialist nurses.  Patients cannot access drug trials  Patients not satisfied with management process | Impact of diagnosis on patients  Impact of diagnosis on support worker  Access to services  Unmet needs of patients | Impact of diagnosis  Gaps in cancer care for women with secondary breast cancer care |
